# Supplementary material for: A comparison of methods for the estimation of the enthalpy of formation of rare earth compounds
Source: Royal Society of Chemistry journal article supplement (doi:10.1039/d1cp03280a), 2021-01-01
Supplement: d1cp03280a1.pdf [file d1cp03280a1.pdf]

## Supporting information for:

# A comparison of methods for the estimation of the enthalpy of formation of rare earth compounds

Sergio Sanchez-Segado,<sup>\*a,b</sup> Sebastien Lectez<sup>c</sup>, Animesh Jha<sup>b</sup> and Stephen Stackhouse<sup>c</sup>

<sup>a</sup>Department of Chemical and Environmental Engineering, Technical University of Cartagena, Cartagena, 30202, Spain.

E-mail: [s.sanchezsegado@leeds.ac.uk](mailto:s.sanchezsegado@leeds.ac.uk) [sergio.segado@upct.es](mailto:sergio.segado@upct.es)

<sup>b</sup>School of Chemical and Process Engineering, University of Leeds, Leeds, LS2 9JT, United Kingdom.

E-mail: [a.jha@leeds.ac.uk](mailto:a.jha@leeds.ac.uk)

<sup>c</sup>School of Earth and Environment, University of Leeds Leeds, LS2 9JT (UK).

E-mail: [s.stackhouse@leeds.ac.uk](mailto:s.stackhouse@leeds.ac.uk)

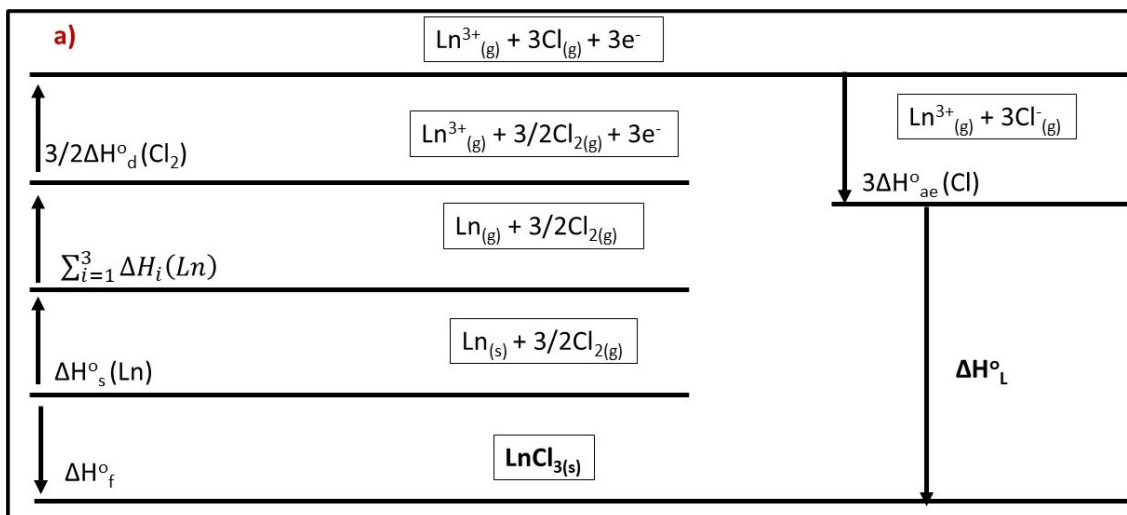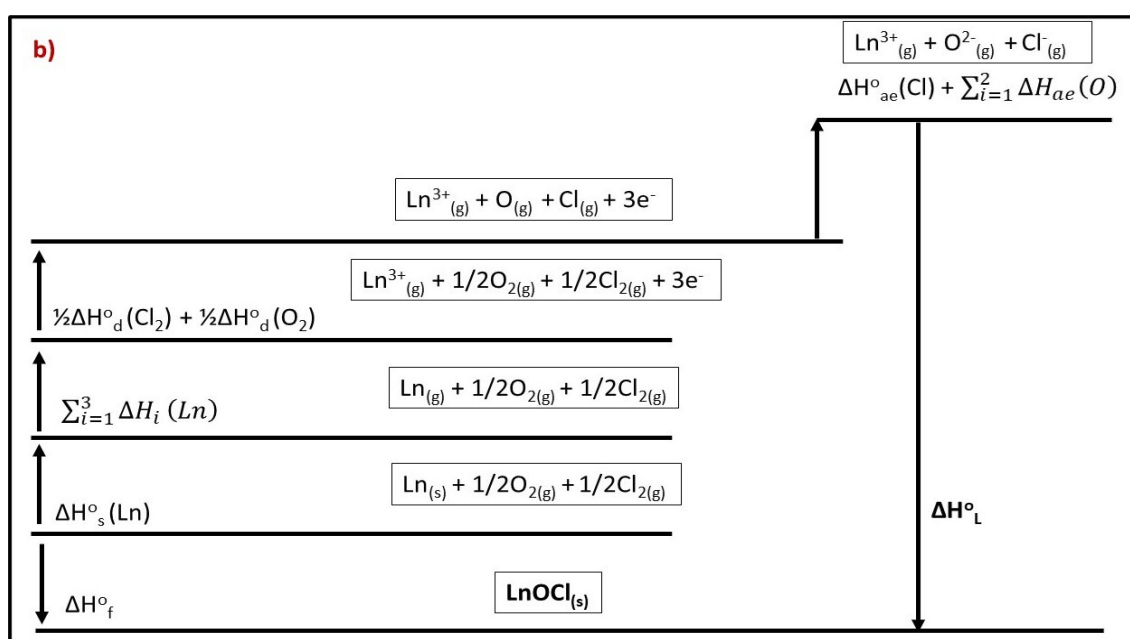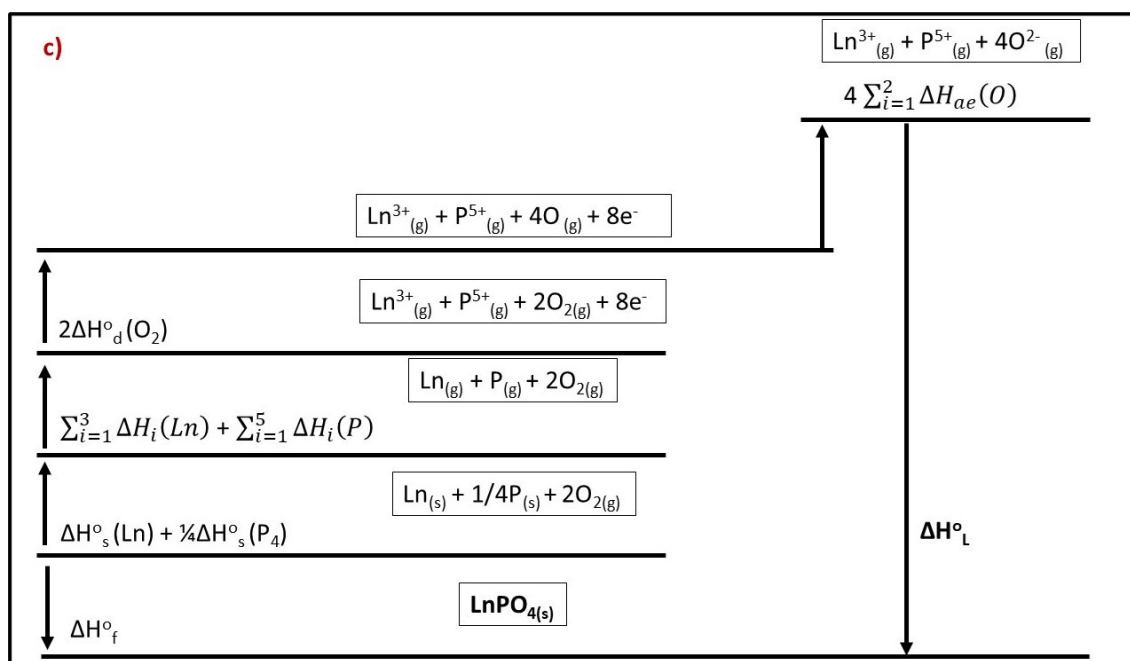

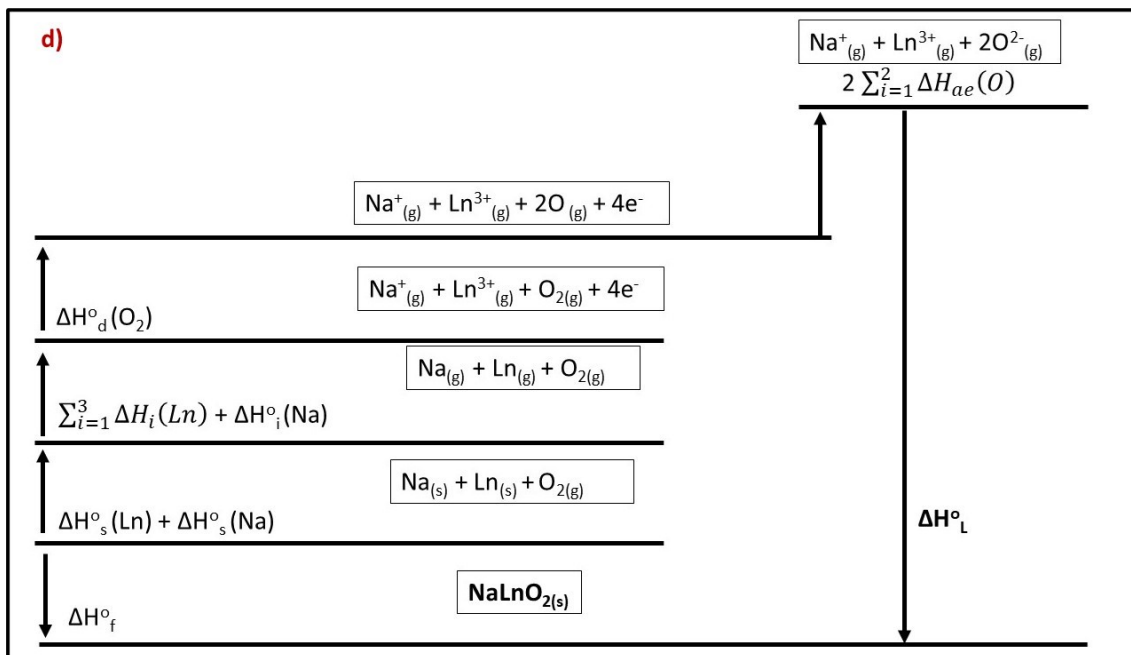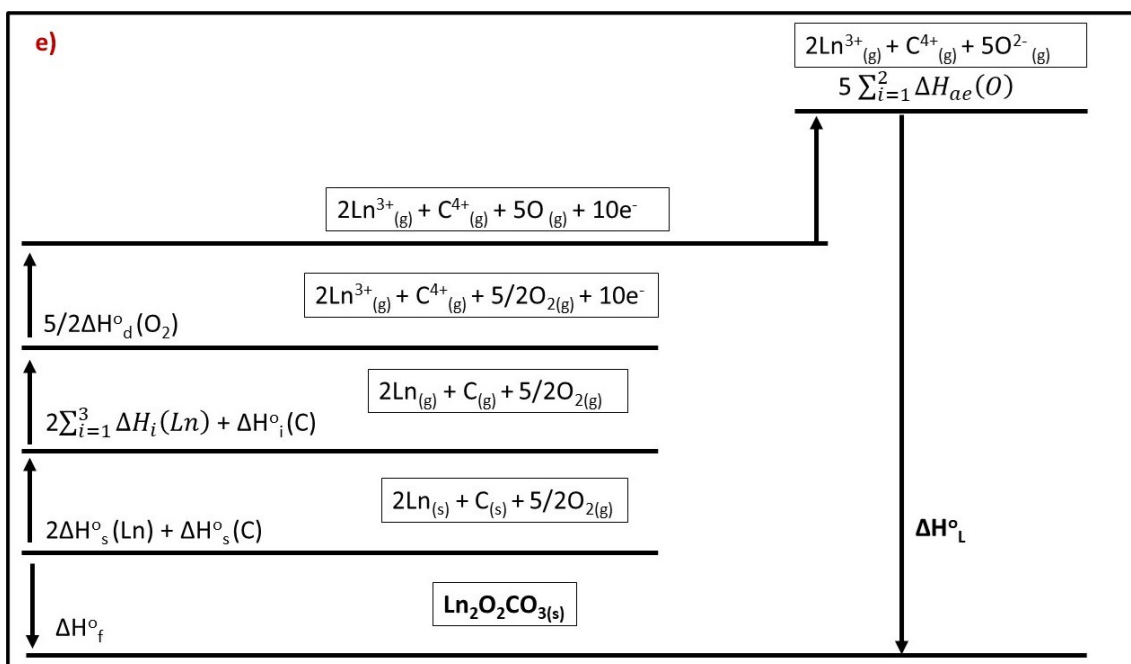

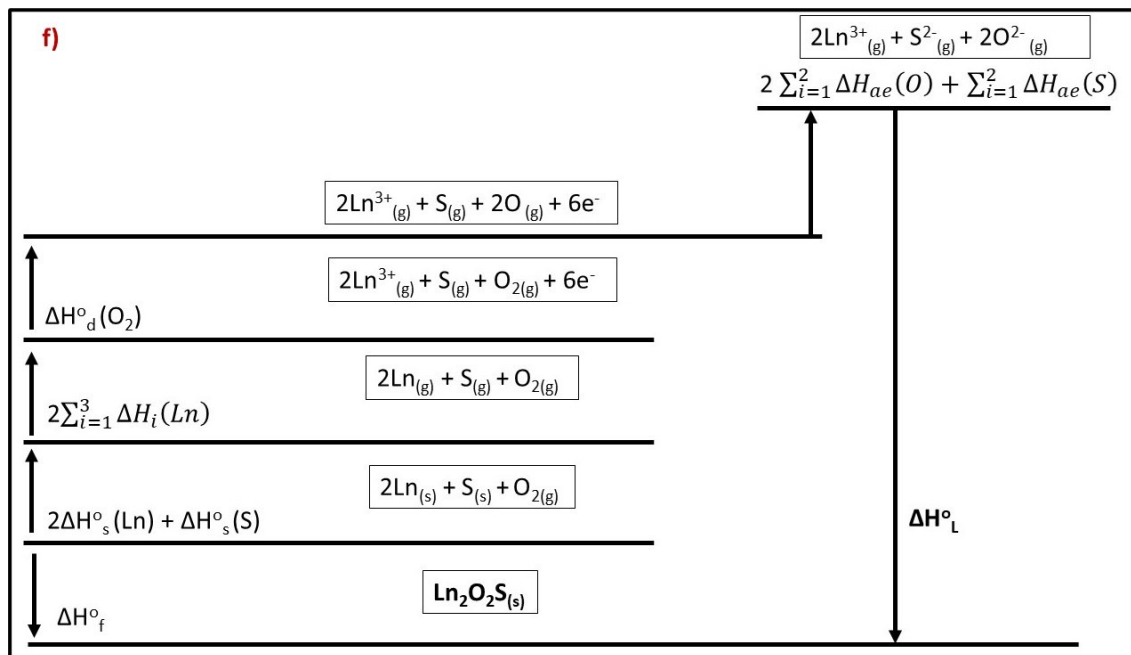

Figure S1. Thermodynamic cycles employed to calculate the enthalpy of formation of a)  $\text{LnCl}_3$ , b)  $\text{LnOCl}$ , c)  $\text{LnPO}_4$ , d)  $\text{NaLnO}_2$ , e)  $\text{Ln}_2\text{O}_2\text{CO}_3$  and f)  $\text{Ln}_2\text{O}_2\text{S}$ . Where  $\Delta H^\circ_s$ ,  $\Delta H^\circ_d$ ,  $\Delta H^\circ_i$ ,  $\Delta H^\circ_{ae}$  are the standard enthalpies of sublimation, dissociation, ionization and electronic affinity respectively.

Table S1. Madelung Energies calculated using EUGEN code ( $E_{\text{Madelung}}$ ), estimated lattice potential energies ( $U_{\text{POT}}$ ), and lattice potential energies ( $U_{\text{POT}}$ ) determined from experimental data taken from ref. 67. All values are in  $\text{kJ mol}^{-1}$ .

| Compound                | $E_{\text{Madelung}}$ calculated using EUGEN | $U_{\text{POT}}$ (this work) | $U_{\text{POT}}^{67}$ |
|-------------------------|----------------------------------------------|------------------------------|-----------------------|
| $\text{LaCl}_3$         | 4343                                         | 4343                         | 4263                  |
| $\text{CeCl}_3$         | 4373                                         | 4373                         | 4348                  |
| $\text{Li}_2\text{S}$   | 2830                                         | 2405                         | 2464                  |
| $\text{Rb}_2\text{S}$   | 2065                                         | 1756                         | 1949                  |
| $\text{Ti}_2\text{O}_3$ | 17368                                        | 14763                        | 14149                 |
| $\text{Cr}_2\text{O}_3$ | 17096                                        | 14532                        | 14957                 |

Table S2. Estimated values of the enthalpy of formation ( $\Delta H_f^0$ ) (kJ mol<sup>-1</sup>) for the rare earth compounds considered in this study using Mostafa's group contribution method

| Ln | LnCl <sub>3</sub> | LnOCl        | LnPO <sub>4</sub> | Ln <sub>2</sub> O <sub>2</sub> CO <sub>3</sub> | Ln <sub>2</sub> O <sub>2</sub> S | NaLnO <sub>2</sub> |
|----|-------------------|--------------|-------------------|------------------------------------------------|----------------------------------|--------------------|
| La | -1050.4±32.3      | -986.5±31.1  | -1891.6±35.0      | -2351.9±67.0                                   | -1626.6±87.2                     | -1283.0±40.6       |
| Ce | -1072.9±72.6      | -1009.0±71.4 | -1914.1±75.2      | -2396.9±147.5                                  | -1671.6±167.6                    | -1305.5±80.9       |
| Pr | -1058.4±34.4      | -994.4±33.2  | -1899.5±37.1      | -2367.8±71.2                                   | -1642.5±91.4                     | -1291.0±42.7       |
| Nd | -1055.8±31.5      | -991.8±30.3  | -1896.9±34.2      | -2362.5±65.4                                   | -1637.2±85.5                     | -1288.4±39.8       |
| Pm |                   |              |                   |                                                |                                  |                    |
| Sm | -1038.8±36.1      | -974.9±34.9  | -1879.9±38.7      | -2328.6±74.6                                   | -1603.4±94.7                     | -1271.4±44.4       |
| Eu | -955.5±36.1       | -891.6±34.9  | -1796.7±38.7      | -2162.1±74.6                                   | -1436.8±94.7                     | -1188.1±44.4       |
| Gd | -1026.5±35.0      | -962.6±33.8  | -1867.6±37.6      | -2304.0±72.3                                   | -1578.8±92.4                     | -1259.1±43.3       |
| Tb | -1047.0±37.8      | -983.1±36.6  | -1888.1±40.4      | -2345.0±77.9                                   | -1619.7±98.0                     | -1279.6±46.1       |
| Dy | -1032.9±36.9      | -968.9±35.7  | -1874.0±39.5      | -2316.8±76.1                                   | -1591.5±96.2                     | -1265.5±45.2       |
| Ho | -1047.9±36.2      | -984.0±35.0  | -1889.0±38.8      | -2346.8±74.7                                   | -1621.6±94.8                     | -1280.5±44.5       |
| Er | -1045.4±36.1      | -981.4±34.9  | -1886.5±38.7      | -2341.8±74.6                                   | -1616.5±94.7                     | -1278.0±44.4       |
| Tm | -1019.2±37.8      | -955.3±36.6  | -1860.4±40.4      | -2289.5±77.9                                   | -1564.2±98.1                     | -1251.8±46.1       |
| Yb | -1005.6±37.8      | -941.6±36.6  | -1846.7±40.4      | -2262.2±77.9                                   | -1536.9±98.0                     | -1238.2±46.1       |
| Lu | -1045.0±37.8      | -981.0±36.6  | -1886.1±40.4      | -2341.0±77.9                                   | -1615.7±98.0                     | -1277.6±46.1       |

Table S3. Estimated values of the enthalpy of formation ( $\Delta H_f^0$ ) (kJ mol<sup>-1</sup>) for the rare earth compounds considered in this study using the volume based thermodynamics method

| Ln | LnCl <sub>3</sub> | LnOCl       | LnPO <sub>4</sub> | Ln <sub>2</sub> O <sub>2</sub> CO <sub>3</sub> | Ln <sub>2</sub> O <sub>2</sub> S | NaLnO <sub>2</sub> |
|----|-------------------|-------------|-------------------|------------------------------------------------|----------------------------------|--------------------|
| La | -661.8±4.0        | -744.3±13.3 | -1879.6±81.7      | 781.4±11.0                                     | -1944.1±14.5                     | -882.9±4.2         |
| Ce | -642.3±12.9       | -748.1±19.5 | -1967.7±56.3      |                                                | -2003.7±29.2                     | -923.9±11.6        |
| Pr | -599.5±32.4       | -754.9±23.0 | -2098.4±70.8      | 682.0±22.5                                     | -2003.1±25.9                     | -900.7±9.9         |
| Nd | -582.3±41.9       | -766.7±47.4 | -2209.0±167.6     | 547.0±86.7                                     |                                  | -891.5±42.0        |
| Pm |                   |             |                   |                                                |                                  |                    |
| Sm | -560.8±37.4       | -742.2±44.9 | -2334.6±93.3      | 396.1±77.4                                     |                                  | -953.8±37.3        |
| Eu | -434.9±17.5       | -623.0±22.5 | -2370.0±22.8      | 701.3±23.5                                     |                                  | -847.7±10.4        |
| Gd | -511.3±19.1       | -716.3±30.9 | -2322.0±60.5      | 242.8±41.2                                     |                                  | -932.6±19.3        |
| Tb |                   | -707.9±27.4 | -2162.5±99.2      |                                                | -2037.2±47.1                     | -1014.4±20.5       |
| Dy | -125.2±37.6       | -719.7±47.8 | -2061.2±81.3      | 414.9±78.1                                     | -2086.1±81.6                     | -1024.5±37.7       |
| Ho | -106.2±19.9       |             | -2161.1±89.2      |                                                |                                  | -961.7±20.1        |
| Er | -97.8±18.7        |             | -2227.0±90.7      | 379.4±40.4                                     |                                  | -981.8±18.8        |
| Tm | -80.7±18.3        |             | -2282.3±69.4      |                                                |                                  | -960.1±18.4        |
| Yb |                   |             | -2341.1±45.9      |                                                |                                  |                    |
| Lu | -46.4±42.1        |             | -2350.5±70.3      |                                                |                                  | -953.8±42.2        |

#### S4. Example calculations for LaPO<sub>4</sub>

##### S4.1. Application of Mostafa et al. group contribution method.

Table S4. Contribution of each group to the enthalpy of formation

| Group                         | Contribution kJ mol <sup>-1</sup> |
|-------------------------------|-----------------------------------|
| La <sup>3+</sup>              | -694.1±18.1                       |
| PO <sub>4</sub> <sup>3-</sup> | -1197.5±16.8                      |

Calculation of the enthalpy of formation

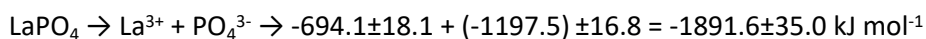

## S4.2. Application of the VBT method for $\text{LaPO}_4$ .

S4.2.1. Calculation of the molecular volume ( $V_m$ ) (For a more detailed description, please read reference 1)

$$V_m = \frac{V_{\text{cell}}}{Z} = \frac{304.76 \text{ \AA}^3}{4} = 76.2 \pm 0.3 \text{ \AA}^3$$

Where  $V_{\text{cell}}$  is the crystal unit cell volume and  $Z$  is the number of formula units contained within the crystallographic unit cell

S4.2.2. Calculation of the ionic strength factor

$$I = \frac{1}{2} \sum n_i z_i^2 = \frac{1}{2} (3^2 + 5^2 + (4 * (-2)^2)) = \frac{1}{2} (50) = 25$$

S4.2.3. Calculation of the lattice enthalpy ( $\Delta H_L$ )

$$U_{\text{POT}} = A I \left( \frac{2I}{V_m} \right)^{\frac{1}{3}} = 121.4 * 25 * \left( \frac{2 * 25}{0.076} \right)^{\frac{1}{3}} = 26315.1 \text{ kJmol}^{-1}$$

$$-\Delta H_L = U_{\text{POT}} + \sum_i^{\text{ions in formula unit}} s_i \left( \frac{c_i}{2} - 2 \right) RT = 26315.1 - 7.5$$

$$\Delta H_L = -26307.6 \pm 76.9 \text{ kJmol}^{-1}$$

S4.2.3. Born-Haber-Fajans cycle

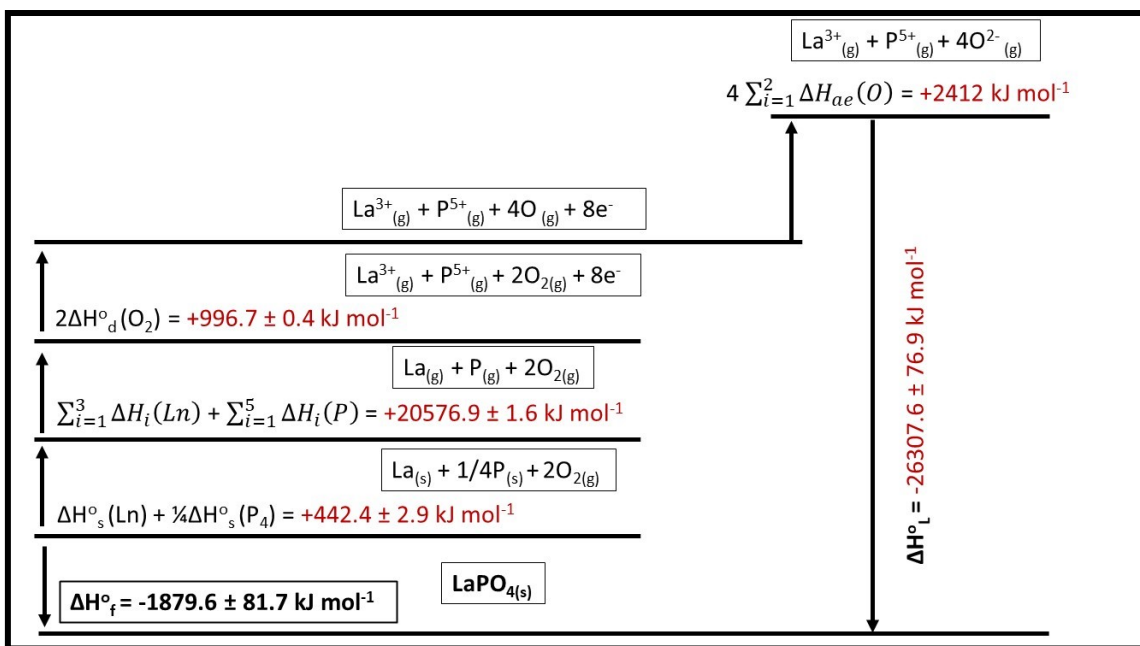

Figure S2. Born-Haber-Fajans cycle for LaPO<sub>4</sub>
